# Supplementary material
Source: PubMed Central journal article supplement (PMC3486609)
Supplement: AAC.01112-12_zac999101364so2.pdf [file AAC.01112-12_zac999101364so2.pdf]

**Supplementary Table 1. *Cyphellophora* isolates and relatives (n=81) included in the study**

| Species Name                      | CBS no.        | Other reference no. | Source                  | Host        | Origin/Geography |
|-----------------------------------|----------------|---------------------|-------------------------|-------------|------------------|
| <i>Cyphellophora guyanensis</i>   | CBS 124764 (T) | CPC 13412           | Eucalyptus              | Plant       | Australia        |
| <i>Cyphellophora guyanensis</i>   | CBS 125751     | dH 20458            | Roof of patient's house | Environment | Brazil           |
| <i>Cyphellophora guyanensis</i>   | CBS 125756     | dH 20483            | Roof of patient's house | Environment | Brazil           |
| <i>Cyphellophora guyanensis</i>   | CBS 125758     | dH 20461            | Tucum palm              | Plant       | Brazil           |
| <i>Cyphellophora guyanensis</i>   | CBS 126014     | dH 20465            | Thorn, Tucum palm       | Plant       | Brazil           |
| <i>Cyphellophora guyanensis</i>   | CBS 126020     | dH 20526            | Rotting wood            | Environment | Brazil           |
| <i>Cyphellophora guyanensis</i>   | CBS 126026     | dH 21344            | Tucum palm              | Plant       | Brazil           |
| <i>Cyphellophora guyanensis</i>   | CBS 126728     | dH 21164            | Fence of wood           | Environment | Brazil           |
| <i>Cyphellophora guyanensis</i>   | CBS 126863     | dH 21173            | Shell of coconut babaçu | Plant       | Brazil           |
| <i>Cyphellophora guyanensis</i>   | CBS 126868     | dH 21293            | Babassu palm stem       | Plant       | Brazil           |
| <i>Cyphellophora guyanensis</i>   | CBS 126888     | dH 21191            | Thorn, Tucum palm       | Plant       | Brazil           |
| <i>Cyphellophora guyanensis</i>   | CBS 126890     | dH 21197            | Fence                   | Environment | Brazil           |
| <i>Cyphellophora guyanensis</i>   | CBS 127018     | dH 21171            | Roof of house           | Environment | Brazil           |
| <i>Cyphellophora guyanensis</i>   | CBS 127814     | dH 21160            | Thorn, Tucum palm       | Plant       | Brazil           |
| <i>Cyphellophora guyanensis</i>   |                | dH 22392            | Hand skin               | Human       | Thailand         |
| <i>Cyphellophora laciniata</i>    | CBS 174.79     | dH 15469            | Foot skin               | Human       | Netherlands      |
| <i>Cyphellophora laciniata</i>    | CBS 190.61 (T) | dH 15498            | Skin                    | Human       | Switzerland      |
| <i>Cyphellophora laciniata</i>    | CBS 239.91     | dH 15600            | Skin                    | Human       | Netherlands      |
| <i>Cyphellophora pauciseptata</i> | CBS 284.85 (T) | dH 15679            | Hand skin               | Human       | Switzerland      |
| <i>Cyphellophora pluriseptata</i> | CBS 285.85     | dH 15681            | Toenail                 | Human       | Netherlands      |
| <i>Cyphellophora pluriseptata</i> | CBS 286.85 (T) | dH 15683            | Toenail                 | Human       | Netherlands      |
| <i>Cyphellophora pluriseptata</i> | CBS 109633     | dH 12325            | Skin scales             | Human       | Germany          |

|                                 |                |          |                       |             |             |
|---------------------------------|----------------|----------|-----------------------|-------------|-------------|
| <i>Cyphellophora suttonii</i>   | CBS 449.91(T)  | dH 15893 | Ear, dog              | Mammal      | USA         |
| <i>Cyphellophora vermispora</i> | CBS 227.86     | dH 15571 | Root, <i>Hordeum</i>  | Plant       | Germany     |
| <i>Cyphellophora vermispora</i> | CBS 228.86 (T) | dH 15574 | Root, <i>Triticum</i> | Plant       | Germany     |
| <i>Cyphellophora vermispora</i> | CBS 122852     |          | Foot skin             | Human       | Netherlands |
| <i>Phialophora ambigua</i>      | CBS 235.93 (T) | dH 15593 | Toenail               | Human       | Netherlands |
| <i>Phialophora europaea</i>     | CBS 124187     | dH 20187 | Bathroom              | Environment | Netherlands |
| <i>Phialophora europaea</i>     | CBS 129.96     | dH 10389 | Toe                   | Human       | Germany     |
| <i>Phialophora europaea</i>     | CBS 218.78     | dH 15563 | Nail                  | Human       | Netherlands |
| <i>Phialophora europaea</i>     | CBS 581.67     | dH 16037 | Unknown               | Unknown     | Unknown     |
| <i>Phialophora europaea</i>     | CBS 656.82     | dH 16135 | Nail                  | Human       | France      |
| <i>Phialophora europaea</i>     | CBS 831.91     | dH 16273 | Nail                  | Human       | Netherlands |
| <i>Phialophora europaea</i>     | CBS 100413     | dH 11172 | Unknown               | Unknown     | Unknown     |
| <i>Phialophora europaea</i>     | CBS 101466 (T) | dH 11284 | Foot skin             | Human       | Netherlands |
| <i>Phialophora europaea</i>     | CBS 102391     | dH 11436 | Skin scales           | Human       | Netherlands |
| <i>Phialophora europaea</i>     | CBS 109045     | dH 15217 | Nail                  | Human       | Canada      |
| <i>Phialophora europaea</i>     | CBS 109500     | dH 12024 | Nail                  | Human       | Unknown     |
| <i>Phialophora europaea</i>     | CBS 109793     | dH 12399 | Toenail               | Human       | Unknown     |
| <i>Phialophora europaea</i>     | CBS 120389     | dH 16666 | Nail                  | Human       | Denmark     |
| <i>Phialophora europaea</i>     | CBS 120392     | dH 16697 | Skin                  | Human       | Denmark     |
| <i>Phialophora europaea</i>     | CBS 120393     | dH 16687 | Toenail               | Human       | Denmark     |
| <i>Phialophora europaea</i>     | CBS 123226     | dH 16655 | Unknown               | Human       | Denmark     |
| <i>Phialophora europaea</i>     | CBS 123234     | dH 17039 | Toenail               | Human       | Denmark     |
| <i>Phialophora europaea</i>     | CBS 123240     | dH 17019 | Foot skin             | Human       | Denmark     |
| <i>Phialophora europaea</i>     | CBS 123256     | dH 17013 | Nail                  | Human       | Denmark     |
| <i>Phialophora europaea</i>     | CBS 123259     | dH 17078 | Toenail               | Human       | Denmark     |
| <i>Phialophora europaea</i>     | CBS 123412     | dH 17489 | Toenail               | Human       | Denmark     |

|                             |                |          |             |             |             |
|-----------------------------|----------------|----------|-------------|-------------|-------------|
| <i>Phialophora europaea</i> | CBS 123415     | dH 17010 | Fingernail  | Human       | Denmark     |
| <i>Phialophora europaea</i> | CBS 123416     | dH 17492 | Toenail     | Human       | Denmark     |
| <i>Phialophora europaea</i> | CBS 123417     | dH 17449 | Nail        | Human       | Denmark     |
| <i>Phialophora europaea</i> | CBS 123422     | dH 17500 | Toenail     | Human       | Denmark     |
| <i>Phialophora europaea</i> | CBS 123425     | dH 17478 | Toenail     | Human       | Denmark     |
| <i>Phialophora europaea</i> | CBS 123430     | dH 17501 | Foot skin   | Human       | Denmark     |
| <i>Phialophora europaea</i> | CBS 123431     | dH 17062 | Toenail     | Human       | Denmark     |
| <i>Phialophora europaea</i> | CBS 123434     | dH 17051 | Nail        | Human       | Denmark     |
| <i>Phialophora europaea</i> | CBS 124186     | dH 20185 | Bathroom    | Environment | Netherlands |
| <i>Phialophora europaea</i> | CBS 124273     | dH 17037 | Nail        | Human       | Denmark     |
| <i>Phialophora europaea</i> | CBS 124433     | dH 17470 | Foot skin   | Human       | Denmark     |
| <i>Phialophora europaea</i> | CBS 124676     | dH 16679 | Foot skin   | Human       | Denmark     |
| <i>Phialophora europaea</i> | CBS 124682     | dh 17057 | Toenail     | Human       | Denmark     |
| <i>Phialophora europaea</i> | CBS 124687     | dH 17460 | Nail        | Human       | Denmark     |
| <i>Phialophora europaea</i> |                | dH 11478 | Unknown     | Human       | Germany     |
| <i>Phialophora europaea</i> |                | dH 12323 | Nail        | Human       | Germany     |
| <i>Phialophora europaea</i> |                | dH 12327 | Nail        | Human       | Germany     |
| <i>Phialophora europaea</i> |                | dH 12330 | Nail        | Human       | Germany     |
| <i>Phialophora europaea</i> |                | dH 13359 | Toenail     | Human       | Unknown     |
| <i>Phialophora europaea</i> |                | dH 13370 | Skin lesion | Human       | Unknown     |
| <i>Phialophora europaea</i> |                | dH 17021 | Foot        | Human       | Denmark     |
| <i>Phialophora europaea</i> |                | dH 17452 | Toenail     | Human       | Denmark     |
| <i>Phialophora reptans</i>  | CBS 113.85 (T) | dH 15292 | Food skin   | Environment | Sweden      |
| <i>Phialophora reptans</i>  | CBS 152.90     | dH 15424 | Nail        | Human       | Netherlands |
| <i>Phialophora reptans</i>  | CBS 458.92     | dH 15901 | Skin scales | Human       | Netherlands |
| <i>Phialophora reptans</i>  | CBS 101467     | dH 11283 | Toe         | Human       | Netherlands |

|                             |                |          |                     |             |             |
|-----------------------------|----------------|----------|---------------------|-------------|-------------|
| <i>Phialophora reptans</i>  | CBS 110814     | dH 15281 | Car-wash water      | Environment | Germany     |
| <i>Phialophora reptans</i>  | CBS 120903     | dH 12534 | Drinkwater, biofilm | Environment | Germany     |
| <i>Phialophora reptans</i>  | CBS 120913     | dH 17747 | Ice water           | Environment | Netherlands |
| <i>Phialophora reptans</i>  | CBS 123271     | dH 17088 | Toenail             | Human       | Denmark     |
| <i>Phialophora oxyspora</i> | CBS 416.89     | dH 17023 | Skin                | Human       | Denmark     |
| <i>Phialophora oxyspora</i> | CBS 698.73 (T) | dH 21366 | Decaying leaf       | Plant       | Sri Lanka   |
| <i>Phialophora oxyspora</i> | CBS 124686     | dH 17079 | Toenail             | Human       | Denmark     |

---

Abbreviations used: CBS = Centraalbureau voor Schimmelcultures, Utrecht, The Netherlands; CPC: Culture collection of P.W. Crous, housed at CBS;  
dH = G.S. de Hoog private collection

**Supplementary Table 2.** Geometric mean MICs, MIC ranges, MIC<sub>50</sub>s, and MIC<sub>90</sub>s of nine antifungal drugs against *Phialophora europaea* isolates from skin and nail specimens

| Strains (number) and drugs                 | MIC (ug/ml)  |        |       | Geometric Mean |
|--------------------------------------------|--------------|--------|-------|----------------|
|                                            | Range        | 50%    | 90%   |                |
| <b><i>P. europaea</i> from skin (n=10)</b> |              |        |       |                |
| Amphotericin B                             | 1–16         | 2      | 16    | 1.414          |
| Fluconazole                                | 4–16         | 4      | 8     | 16             |
| Itraconazole                               | 0.031–0.125  | 0.063  | 0.125 | 0.063          |
| Voriconazole                               | 0.125–0.5    | 0.25   | 0.5   | 0.25           |
| Posaconazole                               | ≤0.016–0.031 | ≤0.016 | 0.031 | 0.016          |
| Isavuconazole                              | 0.5–2        | 1      | 1     | 1.414          |
| Caspofungin                                | 0.25–2       | 1      | 2     | 0.707          |
| Micafungin                                 | ≤0.008–0.5   | 0.125  | 0.25  | 0.032          |
| Terbinafin                                 | 0.25–2       | 0.5    | 1     | 0.707          |
| <b><i>P. europaea</i> from nail (n=31)</b> |              |        |       |                |
| Amphotericin B                             | 0.125–16     | 2      | 16    | 3.595          |
| Fluconazole                                | 2–16         | 8      | 8     | 25.854         |
| Itraconazole                               | ≤0.016–0.5   | 0.063  | 0.25  | 0.078          |
| Voriconazole                               | 0.125–1      | 0.25   | 0.5   | 0.344          |
| Posaconazole                               | ≤0.016–0.125 | ≤0.016 | 0.031 | 0.023          |
| Isavuconazole                              | 0.5–2        | 1      | 1     | 1.616          |
| Caspofungin                                | 0.5–4        | 1      | 2     | 1.306          |
| Micafungin                                 | ≤0.008–4     | 0.25   | 1     | 0.155          |
| Terbinafin                                 | 0.25–2       | 0.5    | 1     | 0.449          |
